# Supplementary material
Source: PubMed Central journal article supplement (PMC3545694)
Supplement: supp_0022034512470954_DS_10.1177_0022034512470954.pdf [file supp_0022034512470954_DS_10.1177_0022034512470954.pdf]

R.S. Lacruz<sup>1\*</sup>, C.E. Smith<sup>2</sup>, I. Kurtz<sup>3</sup>,  
M.J. Hubbard<sup>4</sup>, and M.L. Paine<sup>1\*</sup>

<sup>1</sup>Center for Craniofacial Molecular Biology, Herman Ostrow School of Dentistry, University of Southern California, Los Angeles, USA; <sup>2</sup>Facility for Electron Microscopy Research, Department of Anatomy & Cell Biology, and Faculty of Dentistry, McGill University, Montreal, Canada; <sup>3</sup>Division of Nephrology, David Geffen School of Medicine at UCLA, Los Angeles, CA, USA; and <sup>4</sup>Departments of Paediatrics and Pharmacology, The University of Melbourne, Australia; \*corresponding authors, paine@usc.edu and rodrigo@usc.edu

## New Paradigms on the Transport Functions of Maturation-stage Ameloblasts

*J Dent Res* DOI: 10.1177/0022034512470954

### APPENDIX

**Appendix Table.** Rat-based Primers Used for Real-time PCR

| Symbol              | Name                             | Accession    | Size | Forward              | Reverse               |
|---------------------|----------------------------------|--------------|------|----------------------|-----------------------|
| <b><i>Clca1</i></b> | chloride channel accessory 1     | NM_001107449 | 240  | CATCAAAATATGGGCTCTGG | GGTGAAAGAGGTCAGGAAT   |
| <b><i>Clca2</i></b> | chloride channel accessory 2     | NM_001013202 | 185  | TCTCAATCCGTGGTTGAAT  | ACTTGAGCAAGGAAAACGTG  |
| <b><i>Clca4</i></b> | chloride channel accessory 4     | NM_201419    | 179  | GGTTCTCCAGAGGGATTGTT | TGCAGATGCITTAGTCACCA  |
| <b><i>Clca5</i></b> | chloride channel accessory 5     | NM_001107450 | 185  | TTCGGGATGACTTTGACAAT | GCTTCTATCCATGGCTCTCA  |
| <b><i>Clc1</i></b>  | chloride intracellular channel 1 | NM_001002807 | 237  | TTGCCAAGTTTTCTGCCTAC | CCACCTGGACTATGTGAAGC  |
| <b><i>Clc2</i></b>  | chloride intracellular channel 2 | NM_001009651 | 242  | CCCCTCTCTGGATGAAATTG | TGTCTTCAGGACATGTGTGG  |
| <b><i>Clc3</i></b>  | chloride intracellular channel 3 | NM_001013080 | 164  | CACAATTGCCCATCCTACTC | GGCAGAGAAGCTGTGGAAGA  |
| <b><i>Clc4</i></b>  | chloride intracellular channel 4 | NM_031818    | 208  | GCGACGAGATGACATTAGCA | CTCTTGGCGACGTCAGTCTGA |
| <b><i>Clc5</i></b>  | chloride intracellular channel 5 | NM_053603    | 220  | TGGCAACTGTCTTTCTCTC  | GGGGTACTTCTCAGGGGTTA  |
| <b><i>Clc6</i></b>  | chloride intracellular channel 6 | NM_176078    | 196  | TACCCAAGCTCCACATCATT | GCAAGCCAGCATTACTTCAT  |
